# Supplementary material for: Electrospun polymer nanofiber membrane electrodes and an electrolyte for highly flexible and foldable all-solid-state supercapacitors
Source: Royal Society of Chemistry journal article supplement (doi:10.1039/c5ra00138b), 2015-01-01
Supplement: c5ra00138b1.pdf [file c5ra00138b1.pdf]

**Electrospun polymer nanofiber membrane electrodes and electrolyte  
for highly flexible and foldable all-solid-state supercapacitors**

**Yue-E Miao, Jiajie Yan, Yunpeng Huang, Wei Fan, Tianxi Liu\***

*State Key Laboratory of Molecular Engineering of Polymers, Department of  
Macromolecular Science, Fudan University, Shanghai 200433, PR China.*

*\* Corresponding author. E-mail: [txliu@fudan.edu.cn](mailto:txliu@fudan.edu.cn) (T. X. Liu), Tel: +86-21-  
55664197; Fax: +86-21-65640293.*

**Fig. S1** XRD patterns of CPI, 0.005M PANI/CPI fiber membranes and PANI powder.

**Fig. S2** FTIR spectra of CPI, 0.005M PANI/CPI fiber membranes and PANI powder.

**Fig. S3** (a) CV curves of PANI powder at different scan rates in 1 M H<sub>2</sub>SO<sub>4</sub> from -0.2 to 0.8 V (vs. Ag/AgCl); (b) Charge/discharge curves of PANI powder at different current densities.

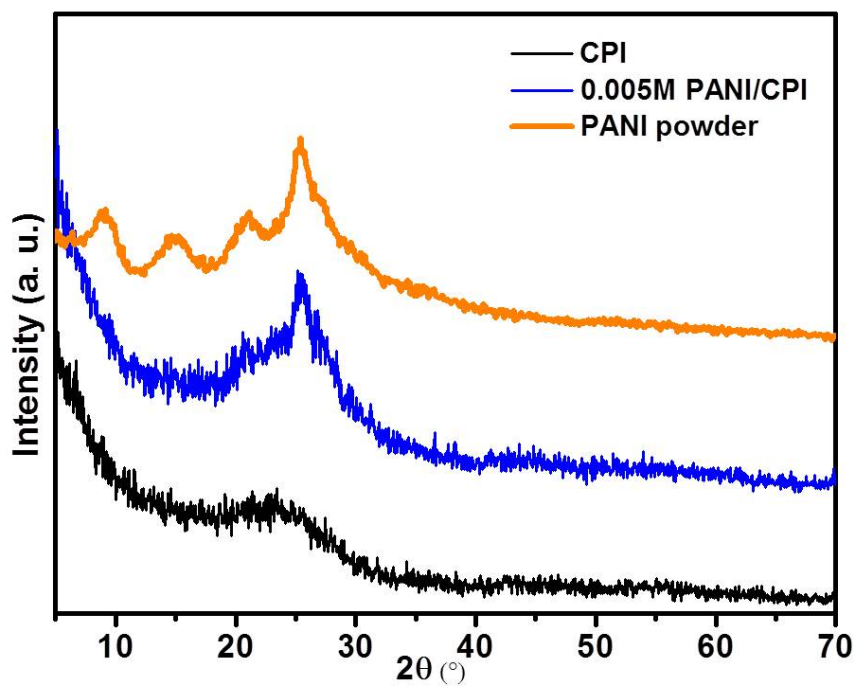

Fig. S1

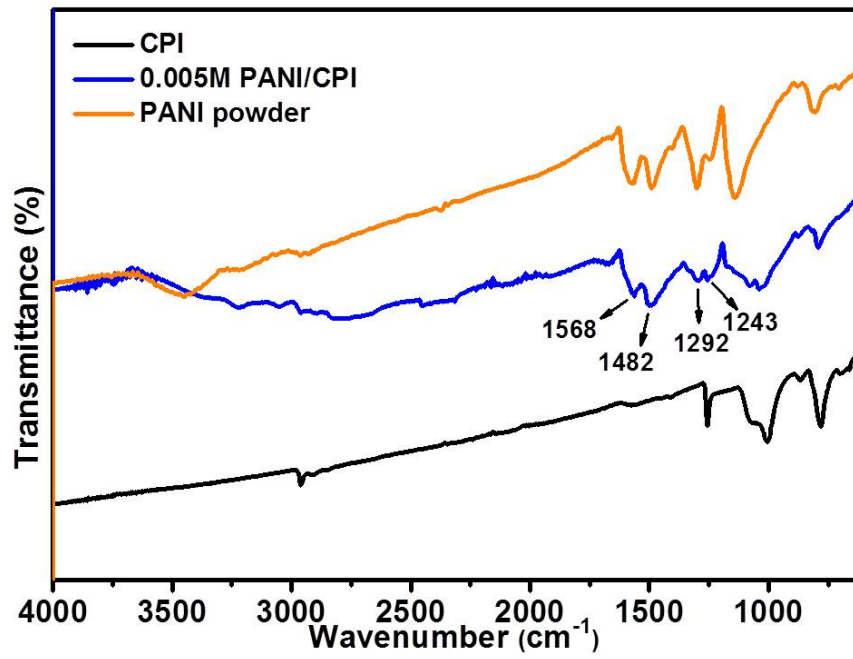

Fig. S2

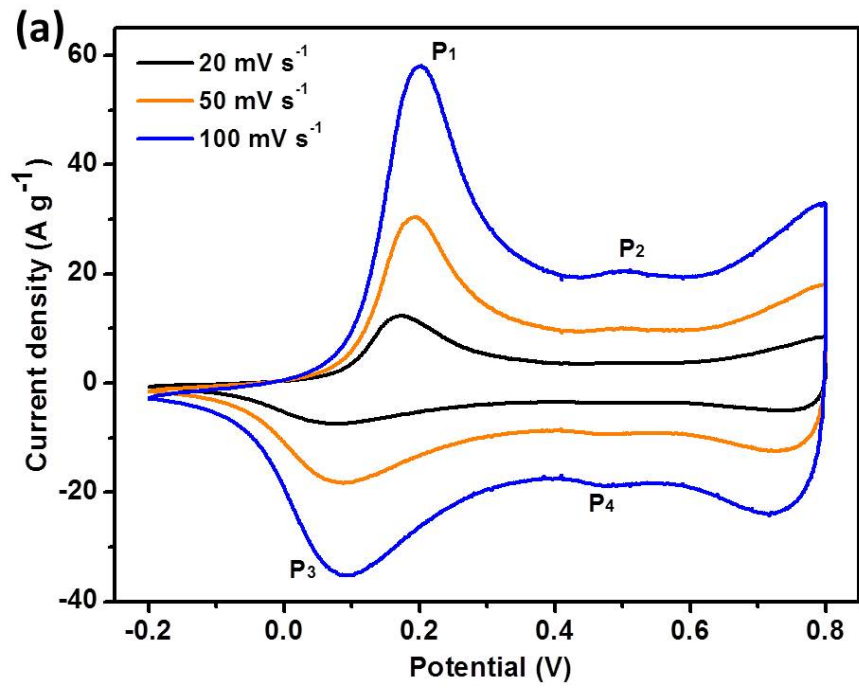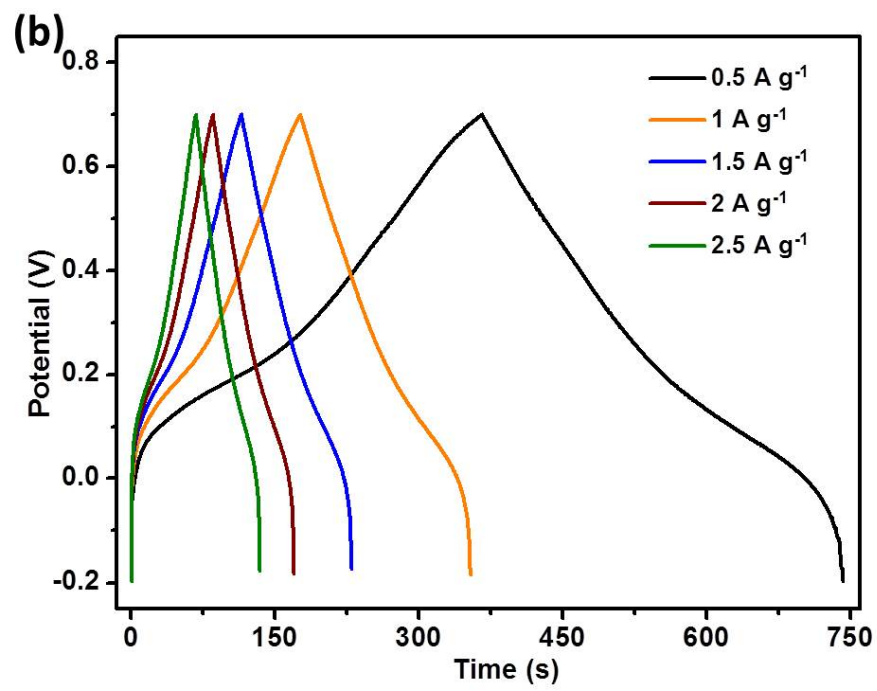

Fig. S3
